# Supplementary material for: Association of Sedentary Behavior with Brain Structure and Intelligence in Children with Overweight or Obesity: The ActiveBrains Project
Source: PubMed Central journal article supplement (PMC7230478; doi:10.3390/jcm9041101), 2020-04-12
Supplement: jcm-09-01101-s001.pdf [file jcm-09-01101-s001.pdf]

**Supplementary table 1.** Brain regions showing negative associations between sedentary behaviors and gray matter volume in overweight/obese children after adjustment for total physical activity (n=99).

| <i>Brain Regions (mm<sup>3</sup>)</i>     | <i>x</i> | <i>y</i> | <i>z</i> | <i>t</i> | <i>Cluster size</i> |
|-------------------------------------------|----------|----------|----------|----------|---------------------|
| <i>Watching TV</i>                        |          |          |          |          |                     |
| Middle frontal gyrus                      | 38       | 44       | 9        | -5.37    | 201                 |
| Inferior frontal gyrus, pars triangularis | -39      | 20       | 27       | -3.85    | 88                  |
| Inferior parietal gyrus                   | -53      | -36      | 41       | -3.66    | 61                  |
| Lingual gyrus                             | 11       | -87      | -11      | -4.45    | 354                 |
| Calcarine cortex                          | 24       | -59      | 12       | -        | -                   |
| Postcentral gyrus                         | -63      | -12      | 11       | -3.50    | 60                  |
| <i>Playing video games</i>                |          |          |          |          |                     |
| Fusiform gyrus                            | 33       | -14      | -33      | -3.83    | 432                 |
| Inferior temporal gyrus                   | 62       | -24      | -30      | -3.74    | 270                 |
| Inferior temporal gyrus                   | -54      | -30      | -21      | -4.05    | 300                 |
| <i>Total sedentary time</i>               |          |          |          |          |                     |
| Cerebellum Crus I                         | 20       | -81      | -27      | -3.46    | 515                 |
| Cerebellum Crus II                        | -42      | -60      | -42      | -3.93    | 2283                |

Analyses were adjusted for sex, peak height velocity offset (years), parent education university level (neither/one/both), body mass index (kg/m<sup>2</sup>) and total physical activity assessed by YAP-S. All contrasts were thresholded using AlphaSim at  $P < 0.001$  with  $k=56$  for watching TV,  $k=43$  for playing video games, and  $k=56$  for total sedentary time and surpassed Hayasaka correction.

Anatomical coordinates (x, y, z) are given in Montreal Neurological Institute (MNI) Atlas space. No brain regions showed a statistically significant positive association between any sedentary behavior variable and gray matter volume.
